# Supplementary material
Source: PubMed Central journal article supplement (PMC6614660)
Supplement: ajtr0011-3659-f3.pdf [file ajtr0011-3659-f3.pdf]

Functional DNA variations in Saudi female with low VO<sub>2max</sub>

**Supplementary Table 1.** List of the significant SNPs (P < 0.005) that are associated in female with low VO<sub>2</sub> max

| S. No | CHR | SNP           | BP        | A1 | F_A     | F_U     | A2 | CHISQ | P         | OR      | SE     | L95      | U95    |
|-------|-----|---------------|-----------|----|---------|---------|----|-------|-----------|---------|--------|----------|--------|
| 1     | 5   | exm499426     | 156770133 | A  | 0.6053  | 0.1071  | G  | 16.75 | 4.26E-05  | 12.78   | 0.6953 | 3.27     | 49.92  |
| 2     | 12  | exm980015     | 7188562   | A  | 0.1053  | 0.5714  | C  | 16.59 | 4.65E-05  | 0.08824 | 0.6521 | 0.02458  | 0.3168 |
| 3     | 17  | exm-rs13695   | 38545193  | A  | 0.05263 | 0.4643  | G  | 15.56 | 8.01E-05  | 0.0641  | 0.8194 | 0.01287  | 0.3194 |
| 4     | 5   | exm2265965    | 79521704  | G  | 0.2105  | 0.6786  | A  | 14.61 | 0.0001323 | 0.1263  | 0.5675 | 0.04153  | 0.3842 |
| 5     | 5   | exm2256903    | 126993249 | C  | 0.6842  | 0.2143  | G  | 14.25 | 0.0001598 | 7.944   | 0.5779 | 2.56     | 24.66  |
| 6     | 21  | exm1582123    | 47851636  | A  | 0.02778 | 0.3929  | G  | 13.78 | 0.0002056 | 0.04416 | 1.085  | 0.00526  | 0.3707 |
| 7     | 6   | exm2266152    | 8869571   | A  | 0.6316  | 0.1786  | G  | 13.43 | 0.0002475 | 7.886   | 0.5971 | 2.447    | 25.42  |
| 8     | 7   | exm2266487    | 145813854 | A  | 0.1944  | 0.6429  | G  | 13.3  | 0.0002648 | 0.1341  | 0.577  | 0.04328  | 0.4155 |
| 9     | 4   | exm2265900    | 188170467 | A  | 0.2632  | 0.7143  | G  | 13.23 | 0.0002751 | 0.1429  | 0.5574 | 0.04791  | 0.426  |
| 10    | 3   | exm325054     | 56667682  | C  | 0.6053  | 0.1786  | G  | 12.02 | 0.0005274 | 7.053   | 0.5947 | 2.199    | 22.62  |
| 11    | 7   | exm657804     | 130007388 | A  | 0.1111  | 0.5     | C  | 11.78 | 0.0005977 | 0.125   | 0.6512 | 0.03488  | 0.448  |
| 12    | 11  | exm881376     | 4790948   | A  | 0.1111  | 0.5     | C  | 11.78 | 0.0005977 | 0.125   | 0.6512 | 0.03488  | 0.448  |
| 13    | 2   | exm2255224    | 242493511 | G  | 0.6316  | 0.2143  | A  | 11.32 | 0.0007657 | 6.286   | 0.5703 | 2.056    | 19.22  |
| 14    | 15  | exm1191910    | 94945719  | C  | 0.02941 | 0.3571  | A  | 11.3  | 0.0007748 | 0.05455 | 1.089  | 0.006454 | 0.461  |
| 15    | 1   | exm2264913    | 166268048 | G  | 0.2632  | 0.6786  | A  | 11.29 | 0.0007776 | 0.1692  | 0.5472 | 0.05788  | 0.4945 |
| 16    | 3   | exm2265588    | 56533016  | A  | 0.2632  | 0.6786  | G  | 11.29 | 0.0007776 | 0.1692  | 0.5472 | 0.05788  | 0.4945 |
| 17    | 14  | exm1087120    | 21993498  | G  | 0.4118  | 0.03846 | A  | 10.95 | 0.0009359 | 17.5    | 1.078  | 2.117    | 144.7  |
| 18    | 22  | exm2273063    | 39493294  | G  | 0.02632 | 0.3214  | A  | 10.92 | 0.0009507 | 0.05706 | 1.091  | 0.006721 | 0.4844 |
| 19    | 19  | exm1414958    | 6760974   | G  | 0.1053  | 0.4643  | A  | 10.87 | 0.0009793 | 0.1357  | 0.6504 | 0.03794  | 0.4857 |
| 20    | 6   | exm-rs2736426 | 31745284  | G  | 0.2105  | 0.6071  | A  | 10.78 | 0.001028  | 0.1725  | 0.555  | 0.05814  | 0.5121 |
| 21    | 19  | exm1512622    | 57646570  | G  | 0.6579  | 0.25    | A  | 10.74 | 0.001049  | 5.769   | 0.5544 | 1.946    | 17.1   |
| 22    | 19  | exm1512672    | 57648277  | T  | 0.6579  | 0.25    | A  | 10.74 | 0.001049  | 5.769   | 0.5544 | 1.946    | 17.1   |
| 23    | 3   | exm324889     | 56628031  | A  | 0.5833  | 0.1786  | G  | 10.7  | 0.001073  | 6.44    | 0.5981 | 1.994    | 20.8   |
| 24    | 6   | exm2270384    | 110239704 | A  | 0.5833  | 0.1786  | G  | 10.7  | 0.001073  | 6.44    | 0.5981 | 1.994    | 20.8   |
| 25    | 2   | exm2269094    | 81583557  | G  | 0.5789  | 0.1786  | A  | 10.69 | 0.001077  | 6.325   | 0.5928 | 1.979    | 20.21  |
| 26    | 11  | exm881327     | 4790268   | A  | 0.1316  | 0.5     | C  | 10.67 | 0.001087  | 0.1515  | 0.6109 | 0.04576  | 0.5017 |
| 27    | 11  | exm881377     | 4790951   | G  | 0.1316  | 0.5     | A  | 10.67 | 0.001087  | 0.1515  | 0.6109 | 0.04576  | 0.5017 |
| 28    | 11  | exm2259690    | 108429200 | A  | 0.1316  | 0.5     | C  | 10.67 | 0.001087  | 0.1515  | 0.6109 | 0.04576  | 0.5017 |
| 29    | 17  | exm2252984    | 38646147  | A  | 0.1842  | 0.5714  | G  | 10.65 | 0.001103  | 0.1694  | 0.5665 | 0.05579  | 0.5141 |
| 30    | 3   | exm324920     | 56650054  | G  | 0.1579  | 0.5357  | A  | 10.61 | 0.001126  | 0.1625  | 0.5844 | 0.05169  | 0.5108 |
| 31    | 17  | exm2272605    | 63428940  | C  | 0.08333 | 0.4286  | A  | 10.46 | 0.001219  | 0.1212  | 0.7138 | 0.02992  | 0.491  |
| 32    | 15  | exm1153874    | 42643529  | G  | 0.1053  | 0.4615  | A  | 10.45 | 0.001226  | 0.1373  | 0.6589 | 0.03773  | 0.4993 |
| 33    | 4   | exm387823     | 7780582   | A  | 0.3684  | 0.03571 | G  | 10.16 | 0.001434  | 15.75   | 1.072  | 1.925    | 128.9  |
| 34    | 6   | exm2270308    | 35024695  | G  | 0.4211  | 0.07143 | A  | 9.935 | 0.001622  | 9.455   | 0.804  | 1.956    | 45.71  |
| 35    | 16  | exm2272347    | 16959637  | A  | 0.2895  | 0.6786  | C  | 9.844 | 0.001704  | 0.193   | 0.5401 | 0.06696  | 0.5562 |

Functional DNA variations in Saudi female with low VO<sub>2max</sub>

|    |    |                |           |   |         |        |   |       |          |         |        |         |        |
|----|----|----------------|-----------|---|---------|--------|---|-------|----------|---------|--------|---------|--------|
| 36 | 16 | exm2252795     | 86817240  | A | 0.2895  | 0.6786 | C | 9.844 | 0.001704 | 0.193   | 0.5401 | 0.06696 | 0.5562 |
| 37 | 7  | exm657803      | 130007381 | G | 0.1667  | 0.5357 | A | 9.73  | 0.001813 | 0.1733  | 0.5862 | 0.05495 | 0.5468 |
| 38 | 3  | exm336348      | 108754238 | A | 0.2895  | 0      | T | 9.726 | 0.001816 | NA      | NA     | NA      | NA     |
| 39 | 5  | exm2261790     | 101019725 | G | 0.2895  | 0      | A | 9.726 | 0.001816 | NA      | NA     | NA      | NA     |
| 40 | 20 | exm1543768     | 43547677  | C | 0.2895  | 0      | A | 9.726 | 0.001816 | NA      | NA     | NA      | NA     |
| 41 | 5  | exm-rs11249661 | 179277874 | A | 0.1944  | 0.5714 | G | 9.722 | 0.00182  | 0.181   | 0.5685 | 0.05941 | 0.5516 |
| 42 | 1  | exm-rs4650994  | 178515312 | A | 0.6389  | 0.25   | G | 9.565 | 0.001983 | 5.308   | 0.5576 | 1.78    | 15.83  |
| 43 | 1  | exm2268809     | 198634625 | G | 0.2632  | 0.6429 | A | 9.515 | 0.002038 | 0.1984  | 0.5397 | 0.06889 | 0.5714 |
| 44 | 2  | exm2261144     | 197404714 | G | 0.2632  | 0.6429 | A | 9.515 | 0.002038 | 0.1984  | 0.5397 | 0.06889 | 0.5714 |
| 45 | 14 | exm1084123     | 20692188  | G | 0.2632  | 0.6429 | A | 9.515 | 0.002038 | 0.1984  | 0.5397 | 0.06889 | 0.5714 |
| 46 | 14 | exm2251692     | 20692291  | A | 0.2632  | 0.6429 | G | 9.515 | 0.002038 | 0.1984  | 0.5397 | 0.06889 | 0.5714 |
| 47 | 14 | exm1084138     | 20692453  | A | 0.2632  | 0.6429 | C | 9.515 | 0.002038 | 0.1984  | 0.5397 | 0.06889 | 0.5714 |
| 48 | 14 | exm1084146     | 20692574  | G | 0.2632  | 0.6429 | A | 9.515 | 0.002038 | 0.1984  | 0.5397 | 0.06889 | 0.5714 |
| 49 | 14 | exm1084150     | 20692643  | G | 0.2632  | 0.6429 | A | 9.515 | 0.002038 | 0.1984  | 0.5397 | 0.06889 | 0.5714 |
| 50 | 1  | exm2268948     | 172668340 | A | 0.07895 | 0.3929 | G | 9.505 | 0.002049 | 0.1325  | 0.7153 | 0.0326  | 0.5382 |
| 51 | 5  | exm474346      | 125802027 | A | 0.07895 | 0.3929 | G | 9.505 | 0.002049 | 0.1325  | 0.7153 | 0.0326  | 0.5382 |
| 52 | 22 | exm1599671     | 30857373  | A | 0.07895 | 0.3929 | C | 9.505 | 0.002049 | 0.1325  | 0.7153 | 0.0326  | 0.5382 |
| 53 | 6  | exm-rs9491696  | 127452639 | G | 0.5526  | 0.1786 | C | 9.448 | 0.002114 | 5.682   | 0.5915 | 1.782   | 18.12  |
| 54 | 14 | exm2260329     | 49904851  | A | 0.6316  | 0.25   | G | 9.424 | 0.002142 | 5.143   | 0.551  | 1.747   | 15.14  |
| 55 | 4  | exm2269729     | 23123307  | A | 0.2368  | 0.6071 | G | 9.259 | 0.002343 | 0.2008  | 0.5434 | 0.06922 | 0.5826 |
| 56 | 11 | exm962900      | 119216504 | A | 0.2368  | 0.6071 | G | 9.259 | 0.002343 | 0.2008  | 0.5434 | 0.06922 | 0.5826 |
| 57 | 11 | exm881341      | 4790471   | A | 0.02632 | 0.2857 | G | 9.211 | 0.002406 | 0.06757 | 1.096  | 0.00788 | 0.5794 |
| 58 | 11 | exm901458      | 43876698  | A | 0.1053  | 0.4286 | G | 9.175 | 0.002453 | 0.1569  | 0.6521 | 0.0437  | 0.5631 |
| 59 | 1  | exm31770       | 24394811  | G | 0.2105  | 0.5714 | A | 9.074 | 0.002593 | 0.2     | 0.5515 | 0.06785 | 0.5895 |
| 60 | 22 | exm1593472     | 24224655  | A | 0.2105  | 0.5714 | G | 9.074 | 0.002593 | 0.2     | 0.5515 | 0.06785 | 0.5895 |
| 61 | 17 | exm1336380     | 48603503  | G | 0.5     | 0.1429 | A | 9.057 | 0.002617 | 6       | 0.63   | 1.745   | 20.63  |
| 62 | 7  | exm657815      | 130008285 | G | 0.1316  | 0.4643 | A | 8.997 | 0.002704 | 0.1748  | 0.6115 | 0.05274 | 0.5795 |
| 63 | 7  | exm2258124     | 130022041 | A | 0.1316  | 0.4643 | G | 8.997 | 0.002704 | 0.1748  | 0.6115 | 0.05274 | 0.5795 |
| 64 | 15 | exm1183089     | 82555242  | G | 0.1316  | 0.4643 | A | 8.997 | 0.002704 | 0.1748  | 0.6115 | 0.05274 | 0.5795 |
| 65 | 1  | exm53060       | 44290530  | G | 0.1842  | 0.5357 | A | 8.963 | 0.002754 | 0.1957  | 0.5645 | 0.06472 | 0.5917 |
| 66 | 5  | exm467585      | 94826655  | A | 0.1842  | 0.5357 | C | 8.963 | 0.002754 | 0.1957  | 0.5645 | 0.06472 | 0.5917 |
| 67 | 12 | exm-rs10444502 | 118353871 | C | 0.1842  | 0.5357 | A | 8.963 | 0.002754 | 0.1957  | 0.5645 | 0.06472 | 0.5917 |
| 68 | 17 | exm-rs11867934 | 16933404  | A | 0.1842  | 0.5357 | G | 8.963 | 0.002754 | 0.1957  | 0.5645 | 0.06472 | 0.5917 |
| 69 | 16 | exm1250585     | 67964203  | G | 0.1579  | 0.5    | A | 8.933 | 0.0028   | 0.1875  | 0.5838 | 0.05972 | 0.5887 |
| 70 | 18 | exm2253586     | 9478794   | A | 0.6579  | 0.2857 | G | 8.932 | 0.002802 | 4.808   | 0.5403 | 1.667   | 13.86  |
| 71 | 20 | exm1529529     | 23424613  | G | 0.3421  | 0.7143 | A | 8.932 | 0.002802 | 0.208   | 0.5403 | 0.07214 | 0.5997 |
| 72 | 1  | exm2265055     | 166169203 | A | 0.2353  | 0.625  | G | 8.929 | 0.002807 | 0.1846  | 0.5842 | 0.05875 | 0.5801 |

Functional DNA variations in Saudi female with low VO<sub>2max</sub>

|     |    |                |           |   |         |         |   |       |          |        |        |         |        |
|-----|----|----------------|-----------|---|---------|---------|---|-------|----------|--------|--------|---------|--------|
| 73  | 2  | exm2263899     | 85299783  | C | 0.5     | 0.1429  | A | 8.905 | 0.002843 | 6      | 0.6346 | 1.73    | 20.81  |
| 74  | 6  | exm-rs1936797  | 127432657 | G | 0.4474  | 0.1071  | A | 8.836 | 0.002954 | 6.746  | 0.6927 | 1.736   | 26.22  |
| 75  | 12 | exm2267381     | 92117210  | G | 0.4474  | 0.1071  | A | 8.836 | 0.002954 | 6.746  | 0.6927 | 1.736   | 26.22  |
| 76  | 3  | exm336286      | 108690221 | G | 0.5789  | 0.2143  | A | 8.777 | 0.003051 | 5.042  | 0.5658 | 1.663   | 15.28  |
| 77  | 16 | exm-rs837763   | 88853729  | G | 0.5789  | 0.2143  | A | 8.777 | 0.003051 | 5.042  | 0.5658 | 1.663   | 15.28  |
| 78  | 12 | exm988079      | 18649057  | A | 0.1316  | 0.4615  | G | 8.616 | 0.003332 | 0.1768 | 0.6205 | 0.05238 | 0.5965 |
| 79  | 17 | exm1347023     | 64216815  | A | 0.2778  | 0       | G | 8.611 | 0.003341 | NA     | NA     | NA      | NA     |
| 80  | 7  | exm596878      | 299881    | A | 0.3158  | 0.6786  | G | 8.518 | 0.003516 | 0.2186 | 0.5344 | 0.07671 | 0.6231 |
| 81  | 14 | exm2267675     | 86378529  | A | 0.3158  | 0.6786  | G | 8.518 | 0.003516 | 0.2186 | 0.5344 | 0.07671 | 0.6231 |
| 82  | 15 | exm-rs7176508  | 70018990  | G | 0.3158  | 0.6786  | A | 8.518 | 0.003516 | 0.2186 | 0.5344 | 0.07671 | 0.6231 |
| 83  | 8  | exm-rs13277113 | 11349186  | A | 0.05263 | 0.3214  | G | 8.386 | 0.00378  | 0.1173 | 0.8316 | 0.02298 | 0.5985 |
| 84  | 8  | exm-rs2618476  | 11352541  | G | 0.05263 | 0.3214  | A | 8.386 | 0.00378  | 0.1173 | 0.8316 | 0.02298 | 0.5985 |
| 85  | 9  | exm2264360     | 8875954   | A | 0.05263 | 0.3214  | C | 8.386 | 0.00378  | 0.1173 | 0.8316 | 0.02298 | 0.5985 |
| 86  | 12 | exm997329      | 48142636  | A | 0.05263 | 0.3214  | G | 8.386 | 0.00378  | 0.1173 | 0.8316 | 0.02298 | 0.5985 |
| 87  | 8  | exm681223      | 10466482  | A | 0.6111  | 0.25    | G | 8.288 | 0.003991 | 4.714  | 0.5544 | 1.59    | 13.97  |
| 88  | 2  | exm2261106     | 16889372  | A | 0.5263  | 0.1786  | C | 8.285 | 0.003998 | 5.111  | 0.5908 | 1.606   | 16.27  |
| 89  | 6  | exm2264210     | 117724462 | C | 0.6053  | 0.25    | A | 8.207 | 0.004174 | 4.6    | 0.5483 | 1.571   | 13.47  |
| 90  | 10 | exm-rs11593576 | 81015896  | A | 0.6053  | 0.25    | G | 8.207 | 0.004174 | 4.6    | 0.5483 | 1.571   | 13.47  |
| 91  | 11 | exm2267169     | 36146156  | A | 0.6053  | 0.25    | G | 8.207 | 0.004174 | 4.6    | 0.5483 | 1.571   | 13.47  |
| 92  | 12 | exm2267405     | 131225471 | A | 0.6053  | 0.25    | G | 8.207 | 0.004174 | 4.6    | 0.5483 | 1.571   | 13.47  |
| 93  | 1  | exm2268778     | 166652275 | G | 0.2895  | 0.6429  | A | 8.173 | 0.004252 | 0.2263 | 0.5324 | 0.07971 | 0.6427 |
| 94  | 14 | exm1095171     | 31355096  | G | 0.2895  | 0.6429  | C | 8.173 | 0.004252 | 0.2263 | 0.5324 | 0.07971 | 0.6427 |
| 95  | 3  | exm-rs2553955  | 107050997 | G | 0.3824  | 0.07143 | A | 8.094 | 0.004442 | 8.048  | 0.8143 | 1.631   | 39.7   |
| 96  | 8  | exm2258998     | 88032231  | C | 0.6471  | 0.2857  | A | 8.028 | 0.004606 | 4.583  | 0.5512 | 1.556   | 13.5   |
| 97  | 12 | exm-rs12424086 | 66364509  | G | 0.3158  | 0.03571 | A | 7.995 | 0.004691 | 12.46  | 1.076  | 1.511   | 102.8  |
| 98  | 22 | exm1595697     | 26157068  | G | 0.4737  | 0.1429  | C | 7.94  | 0.004836 | 5.4    | 0.6303 | 1.57    | 18.57  |
| 99  | 7  | exm2258290     | 27363392  | G | 0.2632  | 0.6071  | A | 7.891 | 0.004968 | 0.2311 | 0.5343 | 0.0811  | 0.6585 |
| 100 | 12 | exm2267380     | 91277503  | A | 0.2632  | 0.6071  | G | 7.891 | 0.004968 | 0.2311 | 0.5343 | 0.0811  | 0.6585 |
| 101 | 14 | exm-rs452036   | 23865885  | A | 0.2632  | 0.6071  | G | 7.891 | 0.004968 | 0.2311 | 0.5343 | 0.0811  | 0.6585 |
| 102 | 16 | exm2272356     | 25753251  | G | 0.2632  | 0.6071  | A | 7.891 | 0.004968 | 0.2311 | 0.5343 | 0.0811  | 0.6585 |
| 103 | 20 | exm-rs6051520  | 351944    | C | 0.2632  | 0.6071  | A | 7.891 | 0.004968 | 0.2311 | 0.5343 | 0.0811  | 0.6585 |
| 104 | 1  | exm-rs10218696 | 172823534 | A | 0.07895 | 0.3571  | G | 7.888 | 0.004976 | 0.1543 | 0.7193 | 0.03767 | 0.6319 |
| 105 | 16 | exm2252682     | 67973953  | A | 0.07895 | 0.3571  | G | 7.888 | 0.004976 | 0.1543 | 0.7193 | 0.03767 | 0.6319 |
| 106 | 19 | exm1495520     | 51323232  | G | 0.07895 | 0.3571  | A | 7.888 | 0.004976 | 0.1543 | 0.7193 | 0.03767 | 0.6319 |

CHR: Chromosome; SNP: Illumina single nucleotide ID; BP: Base pair position at the respective chromosome as per GRCh37.p13; A1: Minor allele name; F\_A: Frequency of minor allele in cases; F\_U: Frequency of minor allele in controls; A2: Major allele name; CHISQ: Basic allelic test chi-square; P: p-value; OR: Odds ratio; SE: Standard error; L95: Lower bound of 95% confidence interval for odds ratio; U95: Upper bound of 95% confidence interval for odds ratio.
